# Supplementary material for: Kaempferol Interferes with Varicella-Zoster Virus Replication in Human Foreskin Fibroblasts
Source: MDPI journal article supplement (doi:10.3390/ph15121582), 2022-12-19
Supplement: s1 [file s1]

*Supplementary materials*

# **Kaempferol interferes with varicella-zoster virus replication in human foreskin fibroblasts**

## **Contents**

**Figure S1. Effects of acyclovir on VZV replication**

**Figure S2. Effects of kaempferol on VZV lytic gene expression**

Figure S1. Effects of acyclovir on VZV replication

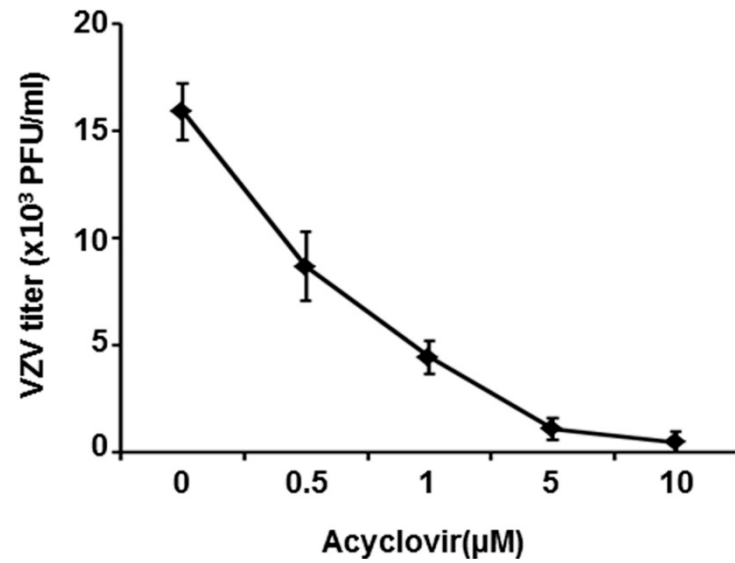

HFFs were inoculated with serially diluted cell-associated VZV-YC01 and treated with acyclovir at the indicated concentrations. Cells were re-treated with the same concentrations of acyclovir 3 d after inoculation. At 6 d after inoculation, cells were stained with 0.3% crystal violet and the number of plaques was counted.

Figure S2. Effects of kaempferol on VZV lytic gene expression.

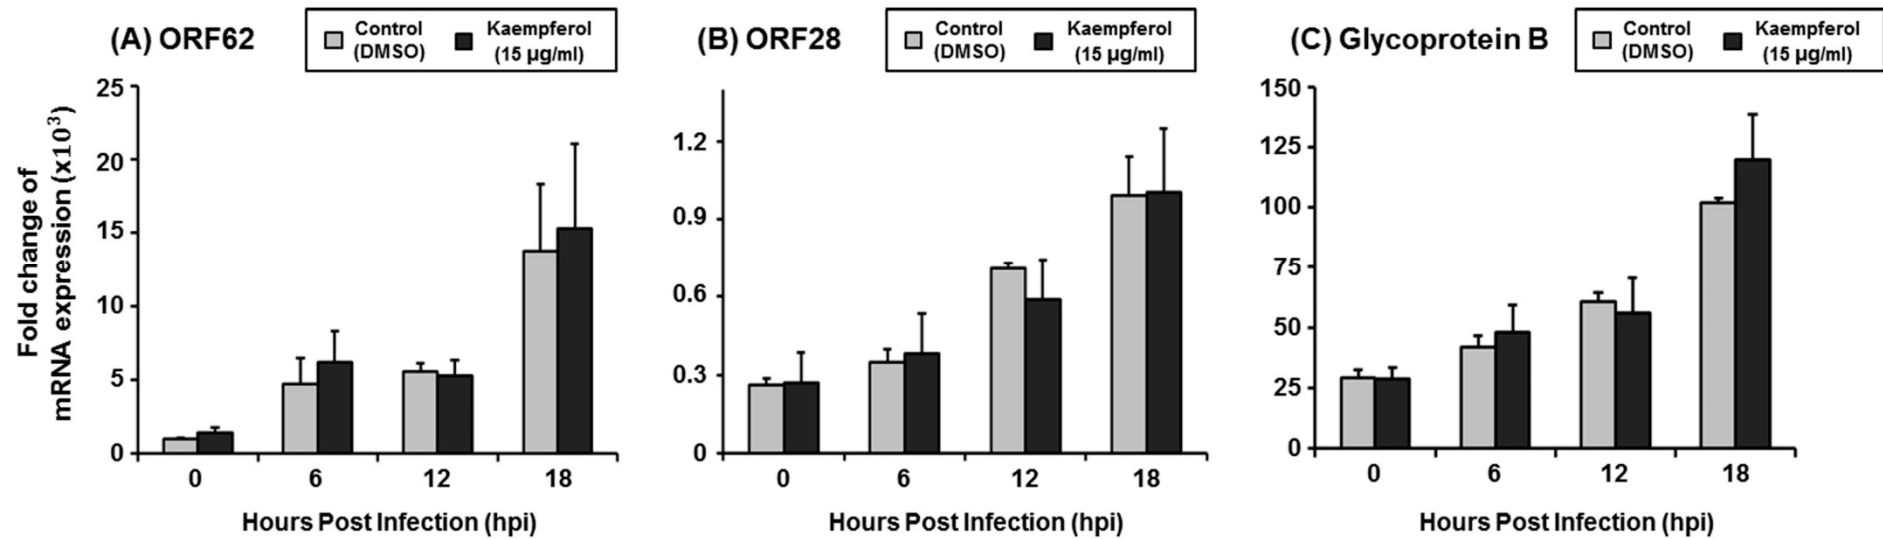

HFFs were inoculated with cell-associated VZV-YC01 at a MOI of 0.1 and treated with DMSO or kaempferol (15 µg/ml). At 0, 6, 12, and 18 h after inoculation, total RNA was extracted and reverse-transcribed into cDNA. The mRNA levels of (A) ORF62 (IE), (B) ORF28 (E) and (C) Glycoprotein B (L) were measured via qRT-PCR. Experiments were performed in triplicate, and values were expressed relative to those in uninfected cells (defined as 1).
